# Supplementary material
Source: PubMed Central journal article supplement (PMC9613758)

**Figure 1A left, IP anti-Flag**

anti-Flag, total lysates

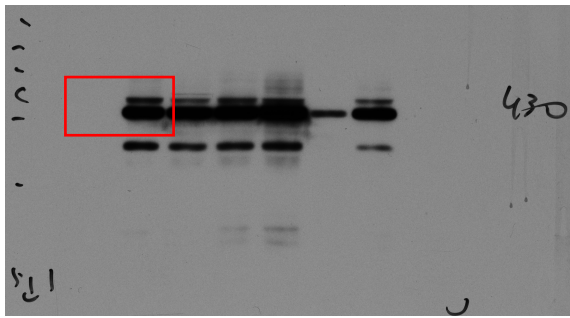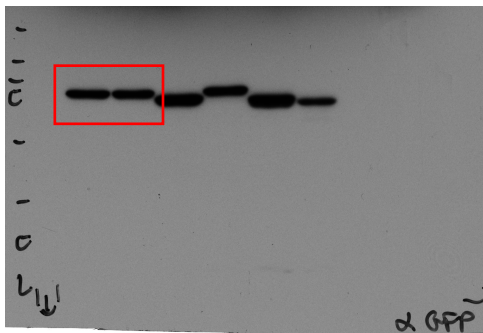

anti-GFP, total lysates

anti-Flag, IP

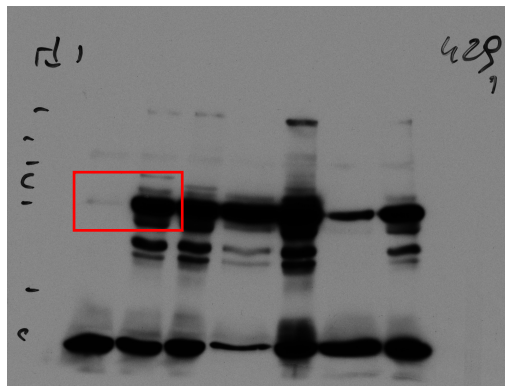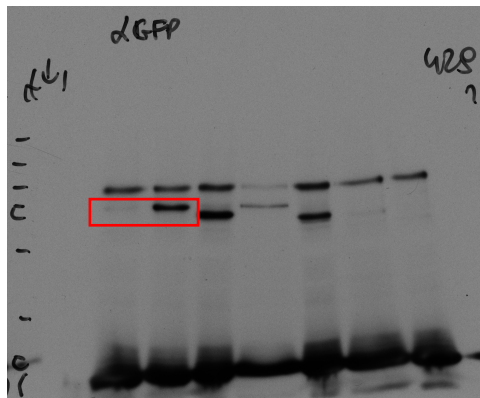

anti-GFP, IP

**Figure 1A right, IP anti-GFP**

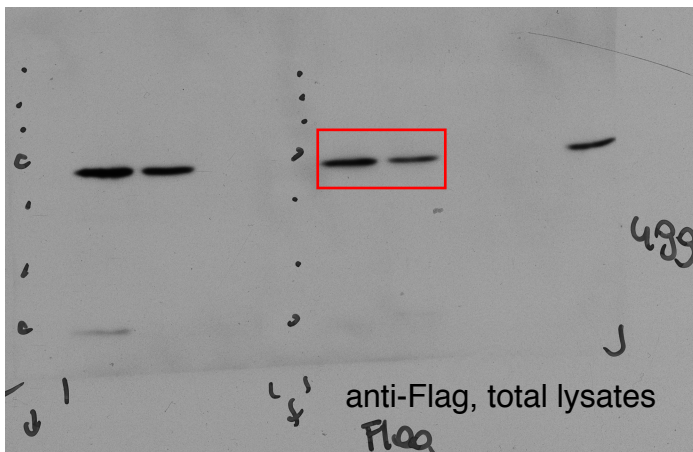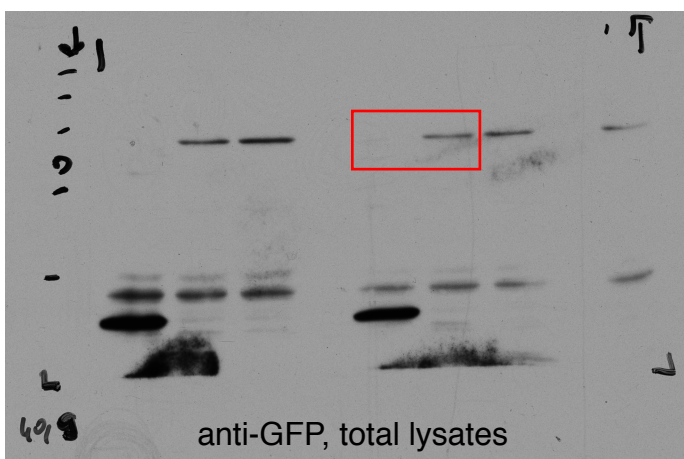

anti-Flag, IP

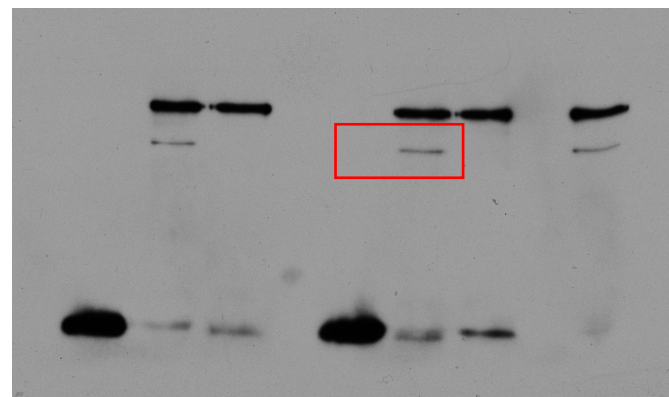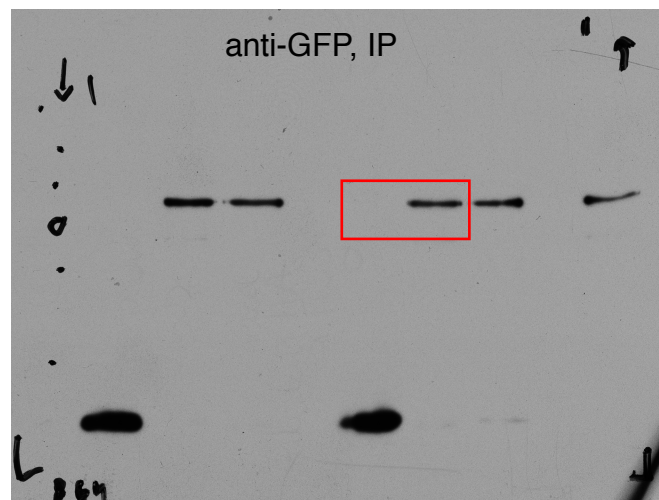

**Figure 1B left, IP anti-Flag**

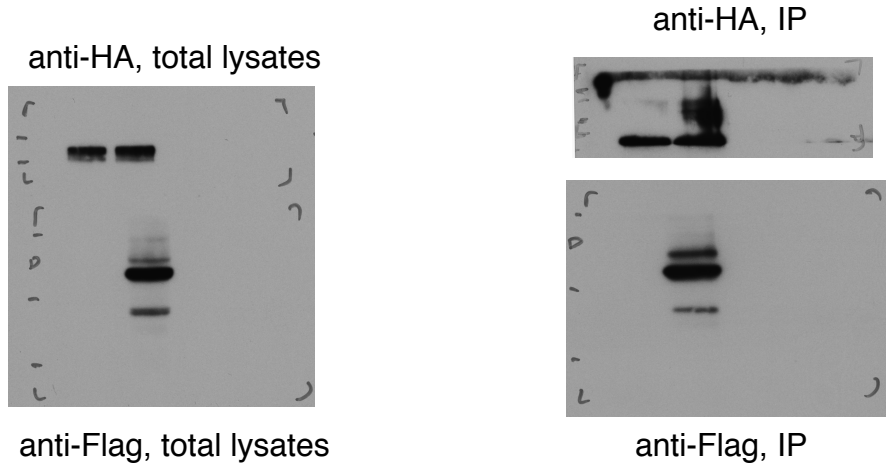

**Figure 1B right, IP anti-HA**

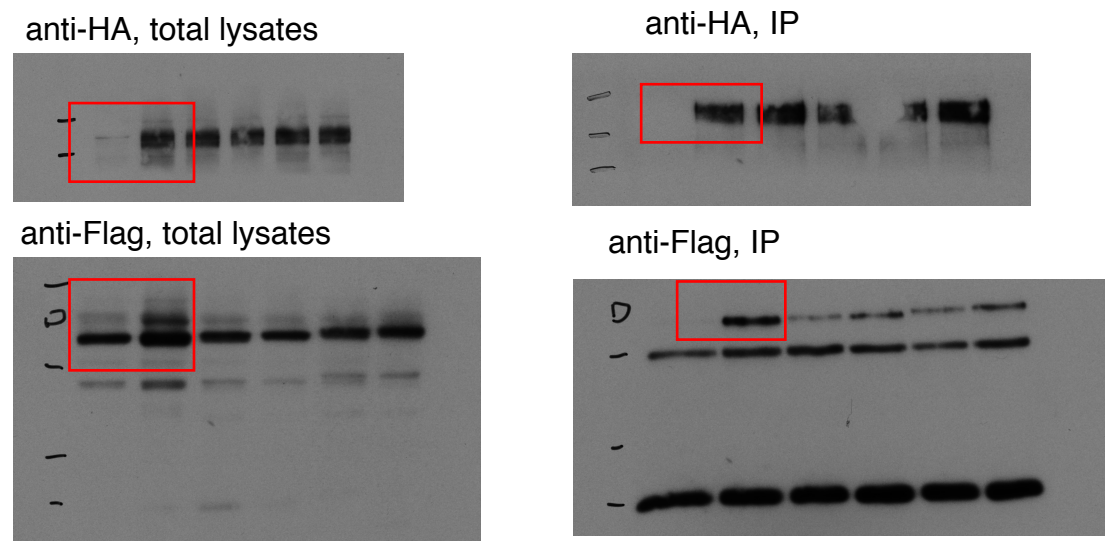

**Figure 1C, IP anti-NFATc3**

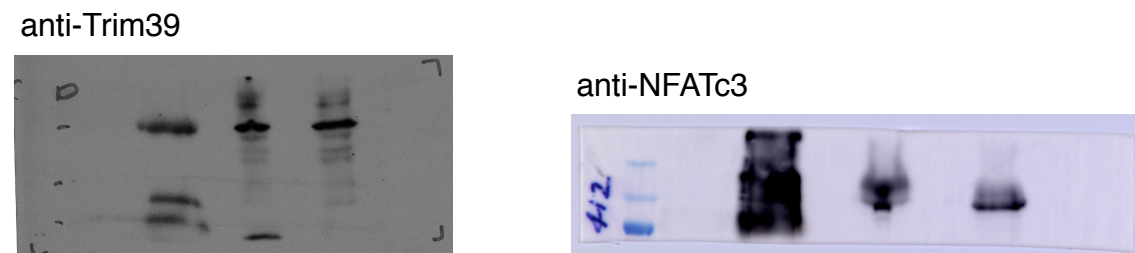

**Figure 2A**

anti-HA, nickel beads

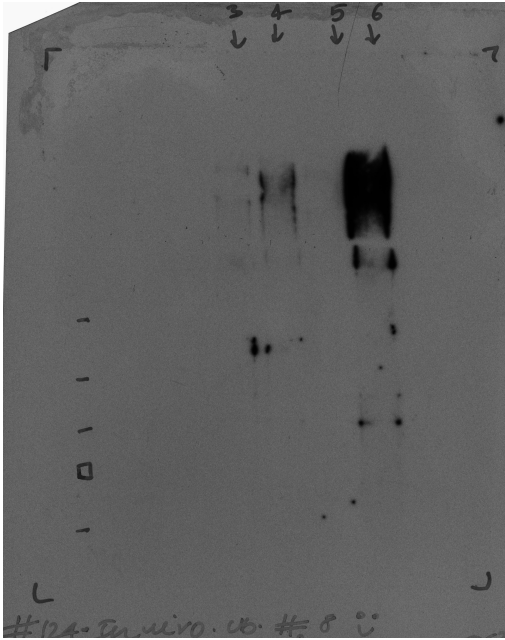

anti-HA, total lysates

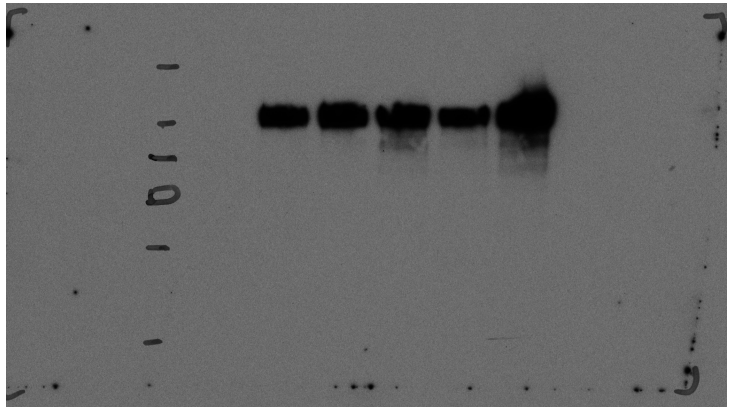

anti-Flag, total lysates

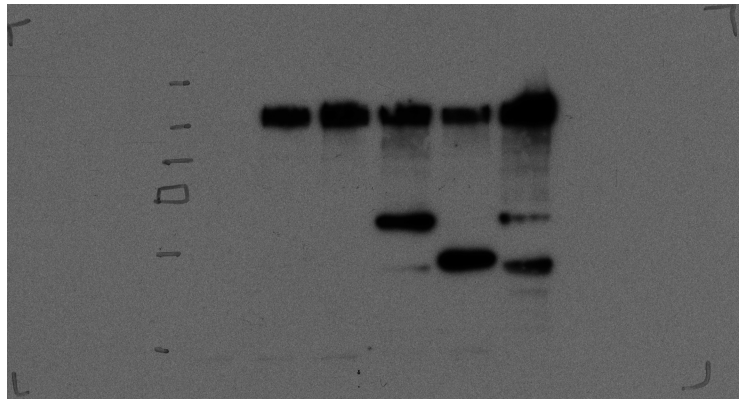

**Figure 2B**

anti-HA, nickel beads

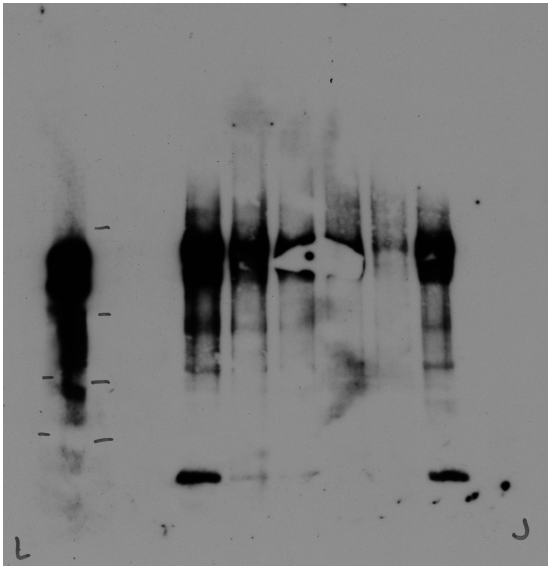

anti-HA, total lysates

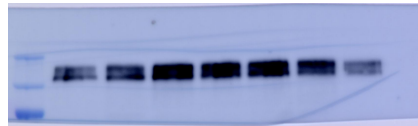

anti-Trim39, total lysates

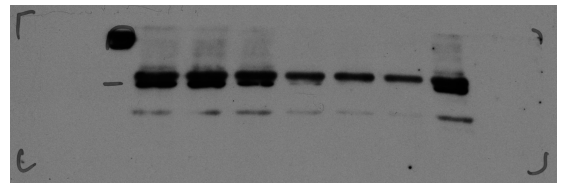

anti-tubulin, total lysates

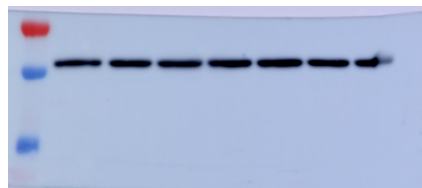

Figure 2C

anti-NFATc3

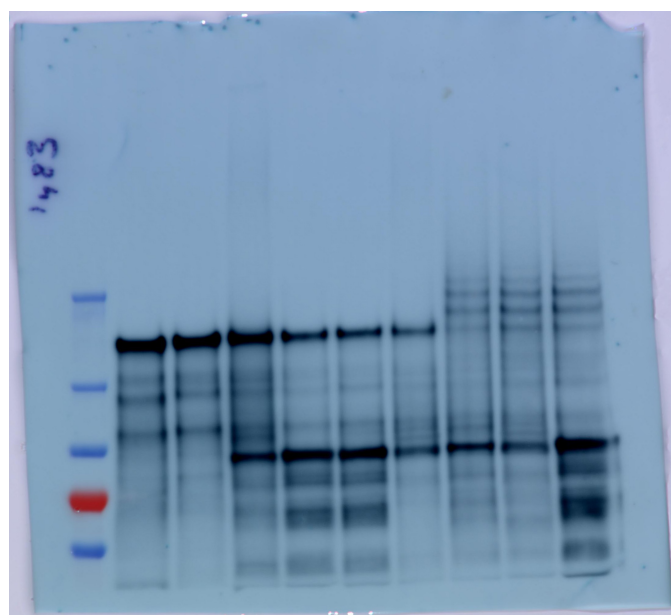

anti-Trim39

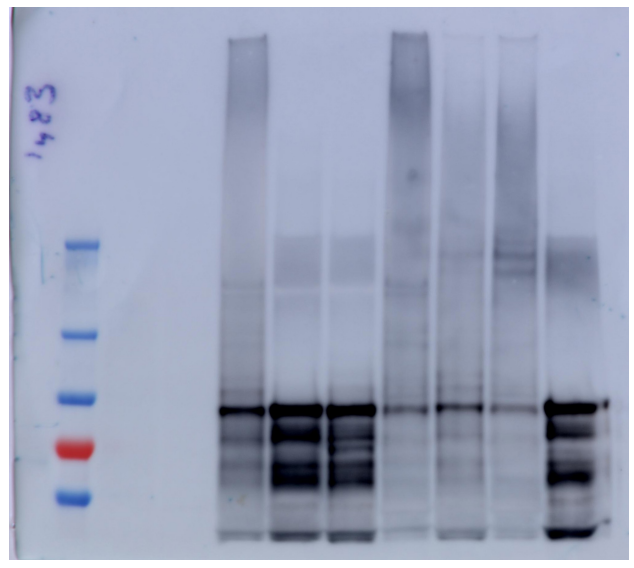

Figure 2D

anti-HA

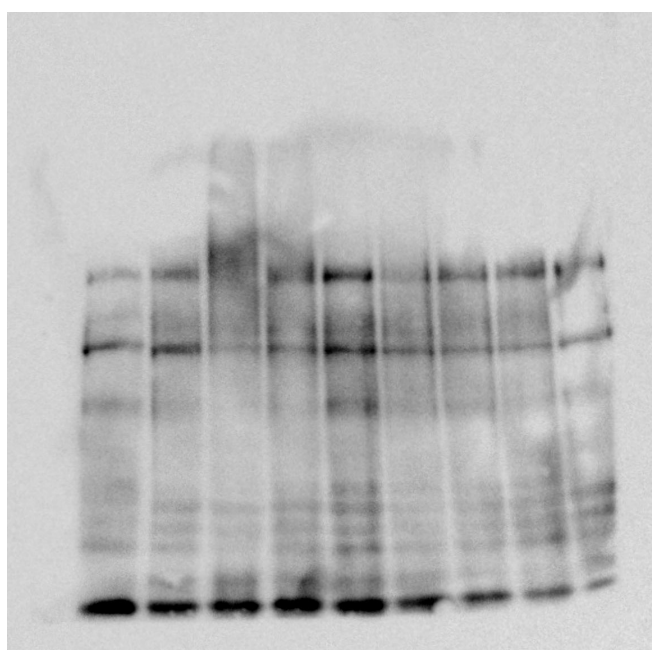

anti-Trim39

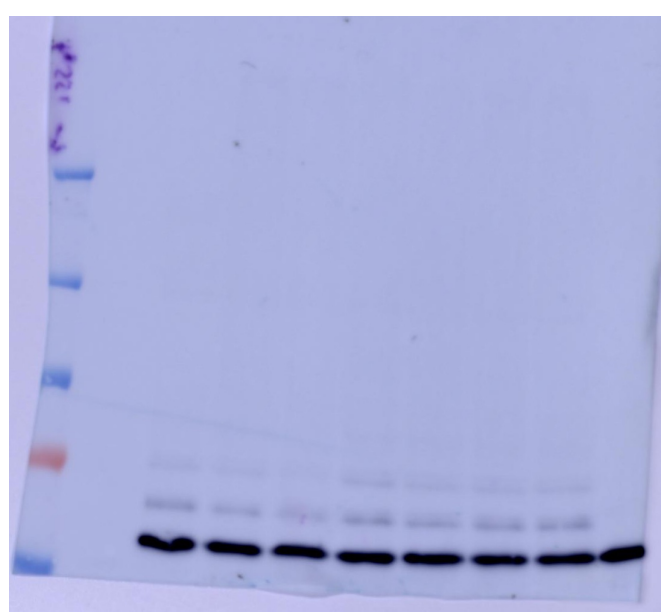

**Figure 3A**

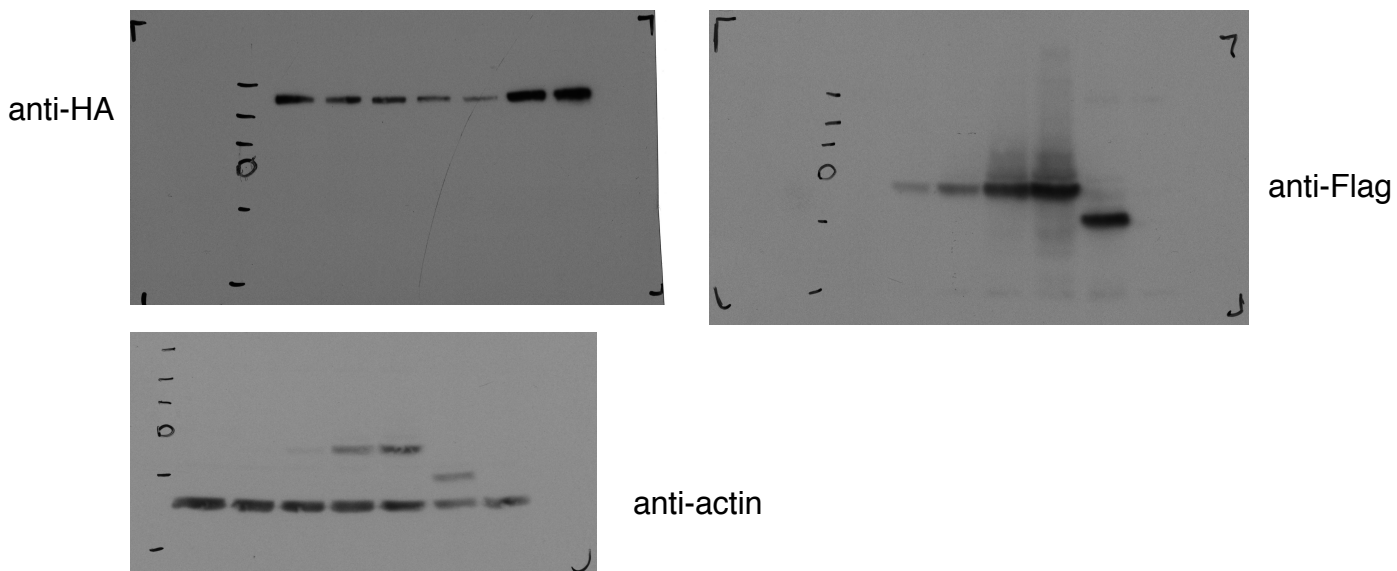

**Figure 3B**

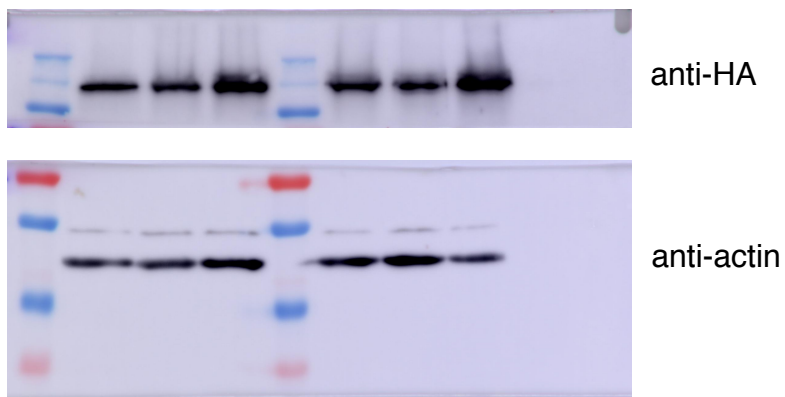

nickel beads

Figure 4A

anti-HA

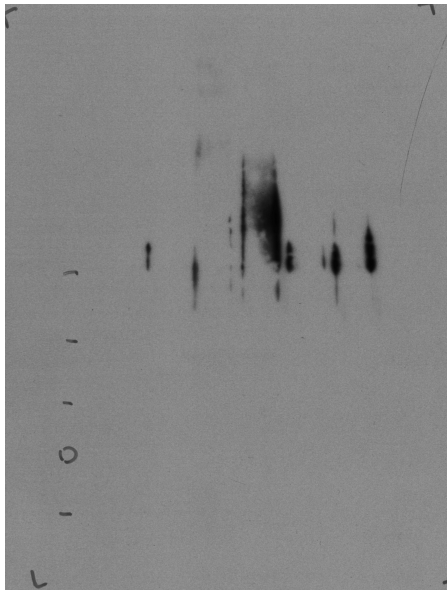

total lysates

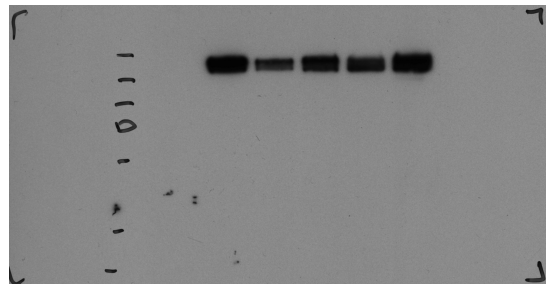

anti-Flag

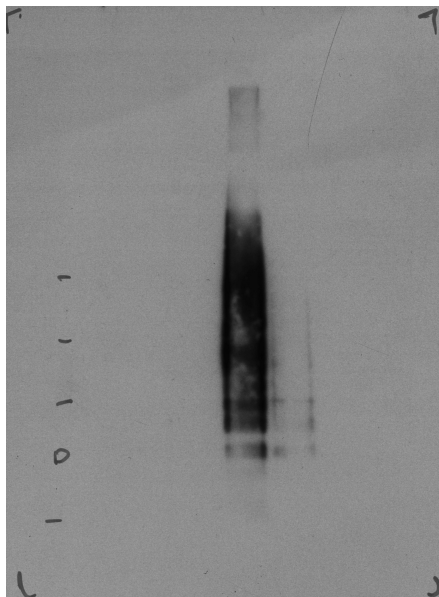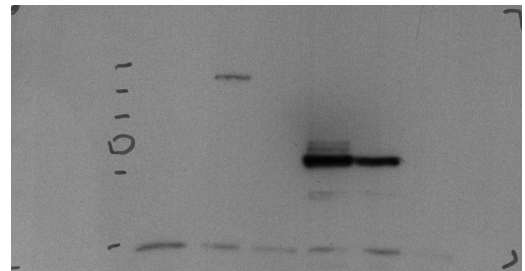

Figure S3

anti-GFP

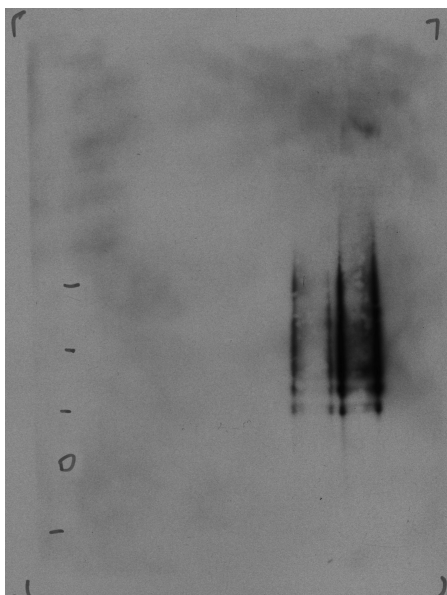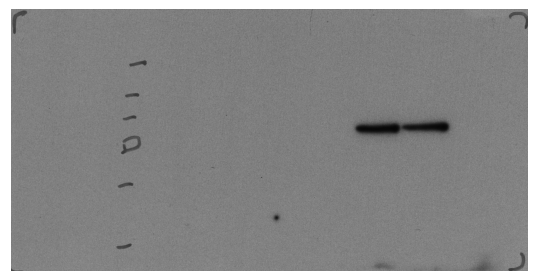

**Figure 4B**

anti-NFATc3

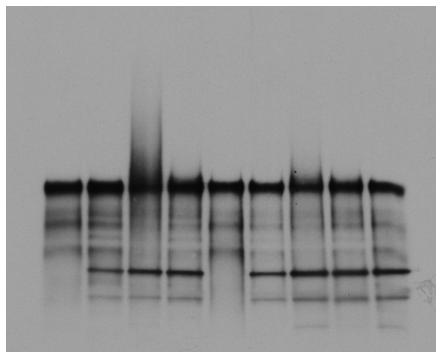

anti-Trim39  
(high exp)

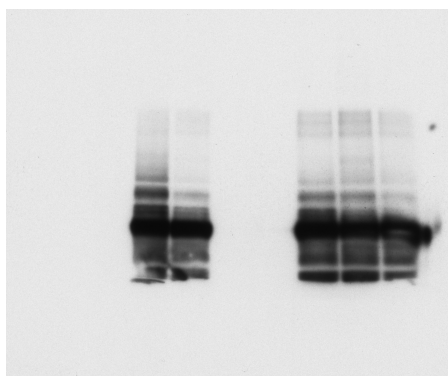

anti-Trim39  
(low exp)

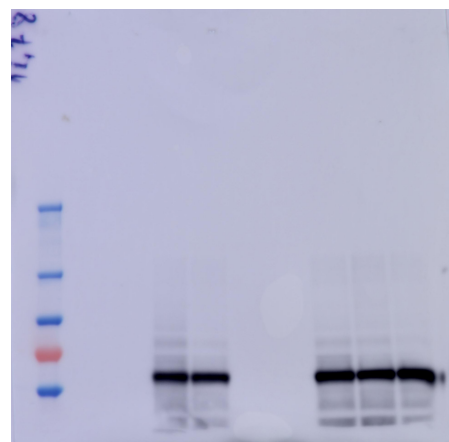

anti-Trim17  
(high exp)

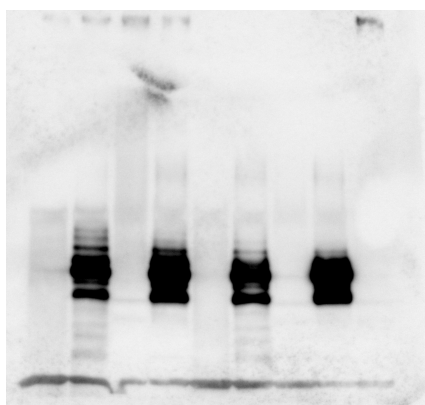

anti-Trim17  
(low exp)

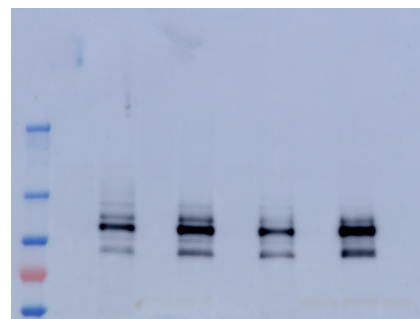

**Figure 4C**

anti-HA

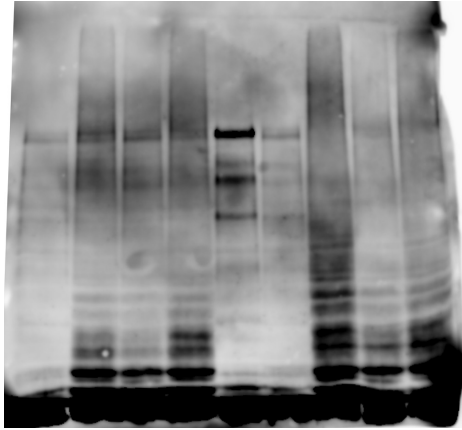

anti-Trim39

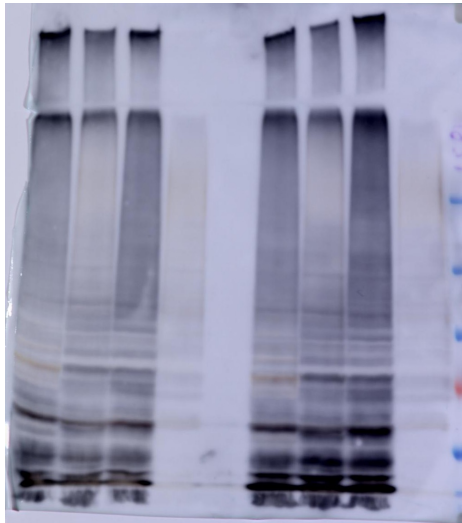

anti-Trim17

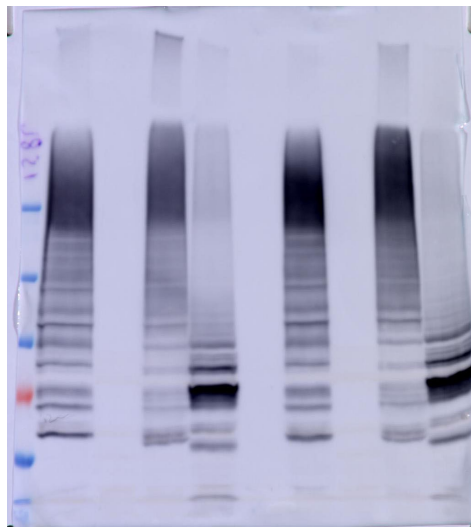



**Figure 5A**

IP anti-HA

anti-HA

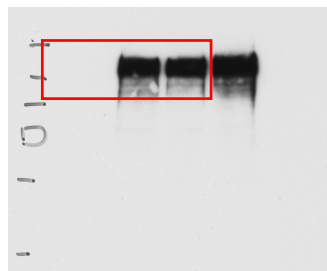

total lysates

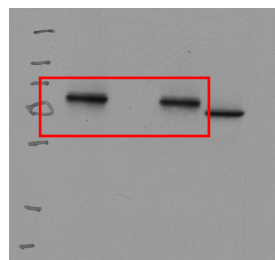

anti-GFP

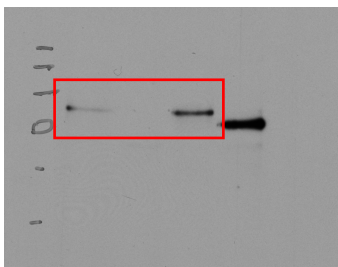

anti-Flag

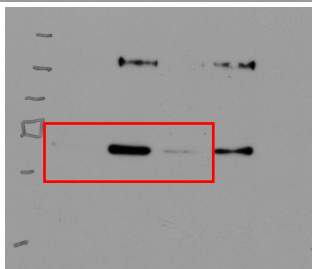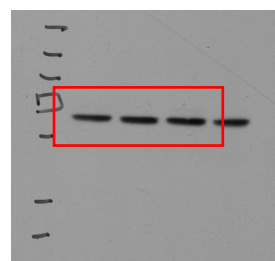

**Figure 5B**

IP anti-Flag

total lysates

anti-HA

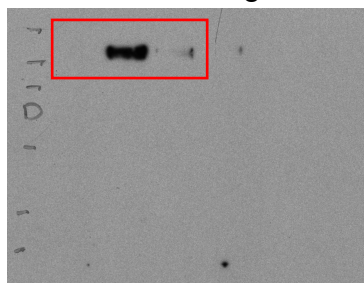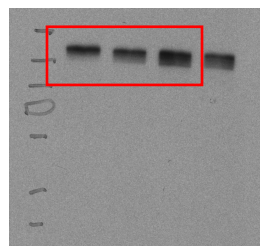

anti-GFP

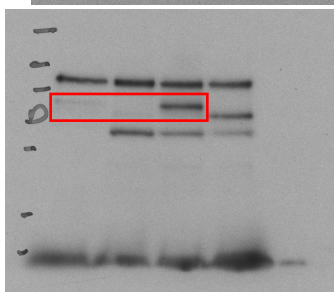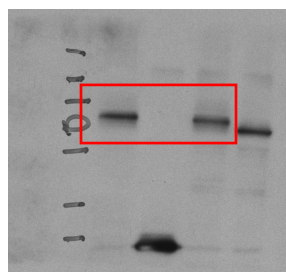

anti-Flag

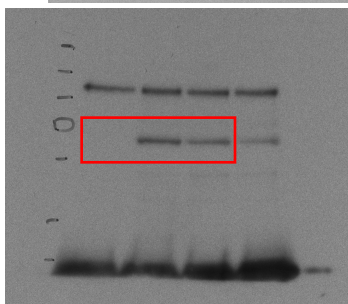

**Figure 6A**

upper picture

lower picture

anti-NFATc3

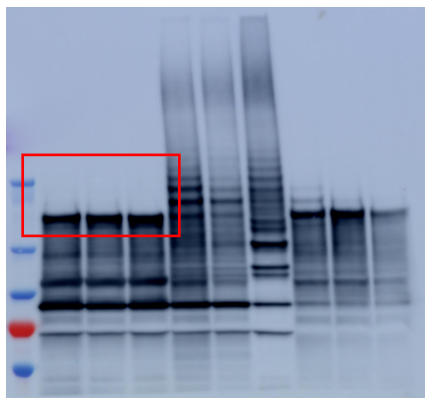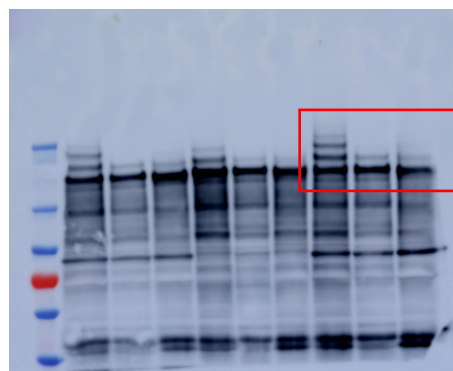

**Figure S4A**

anti-HA

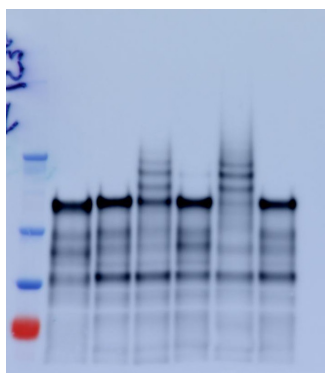

**Figure S4B**

anti-SUMO-2

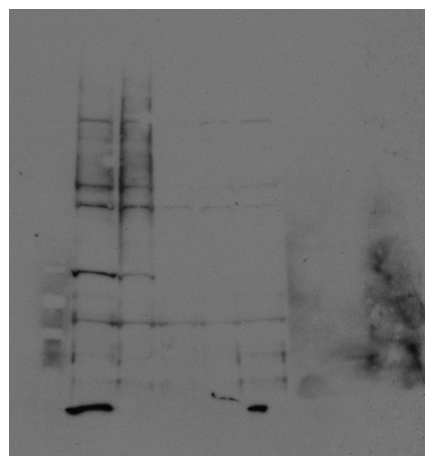

**Figure 6B**

nickel beads

total lysates

anti-HA

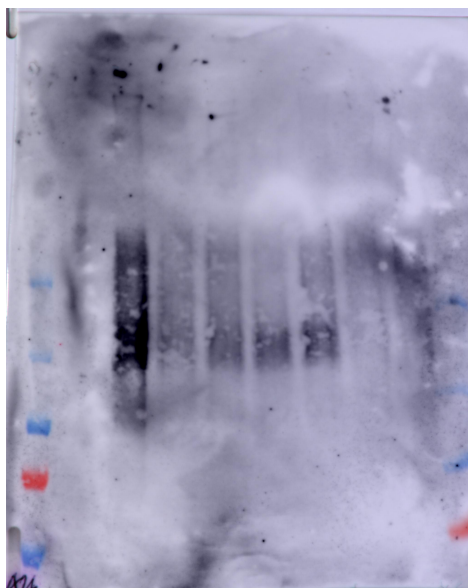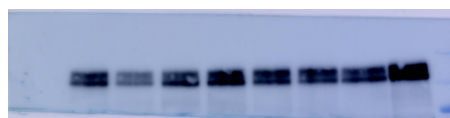

anti-HA

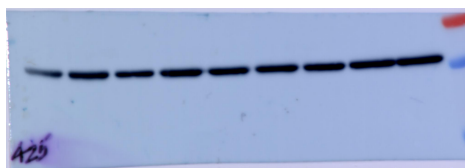

anti-tubulin

**Figure 6C**

nickel beads

anti-HA

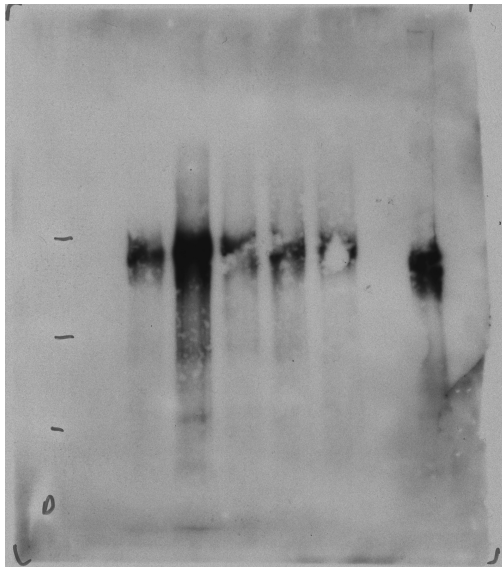

total lysates

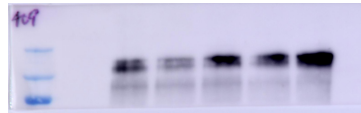

anti-HA

**Figure 6E**

NFATc3-WT

NFATc3-EallA

anti-HA

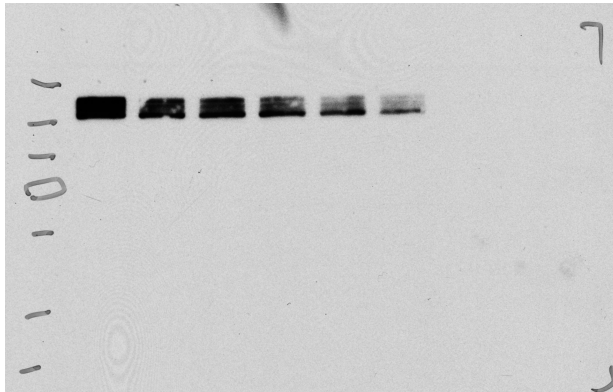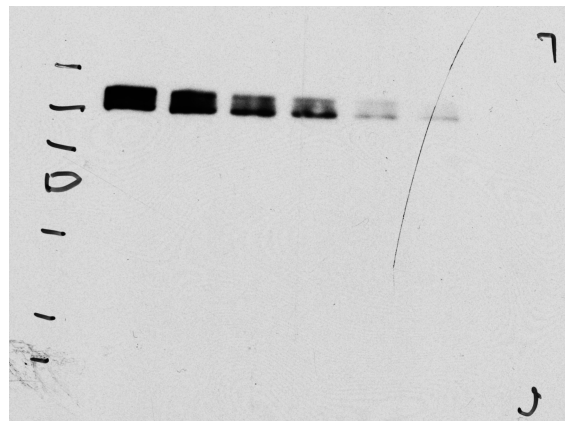

anti-tubulin

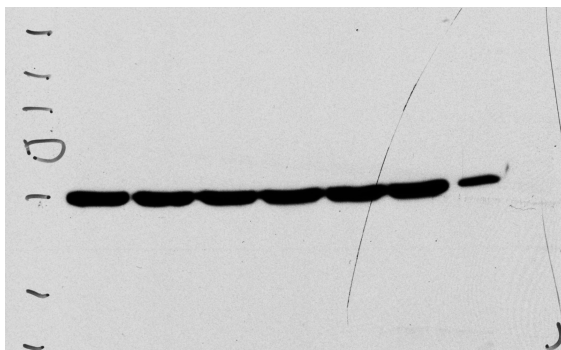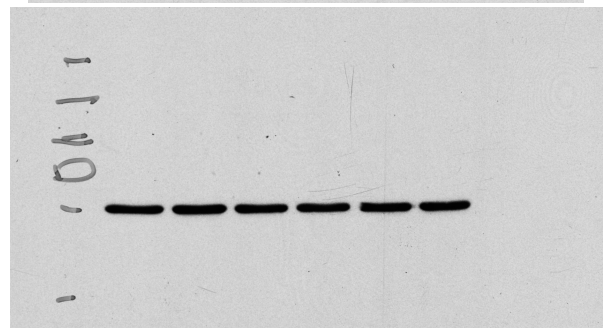

**Figure 7A**

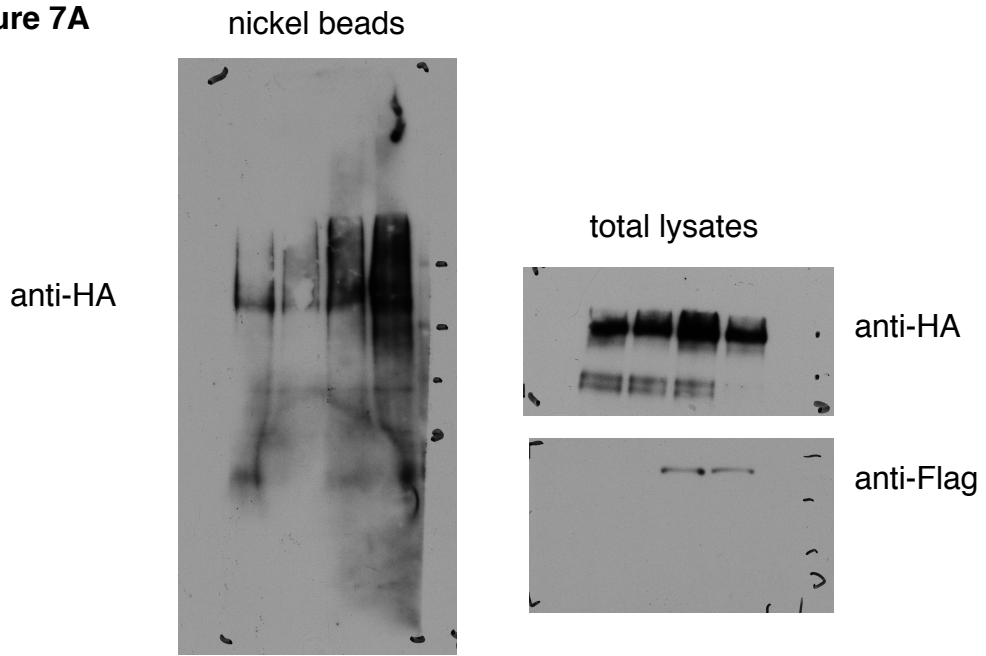

**Figure 7B**

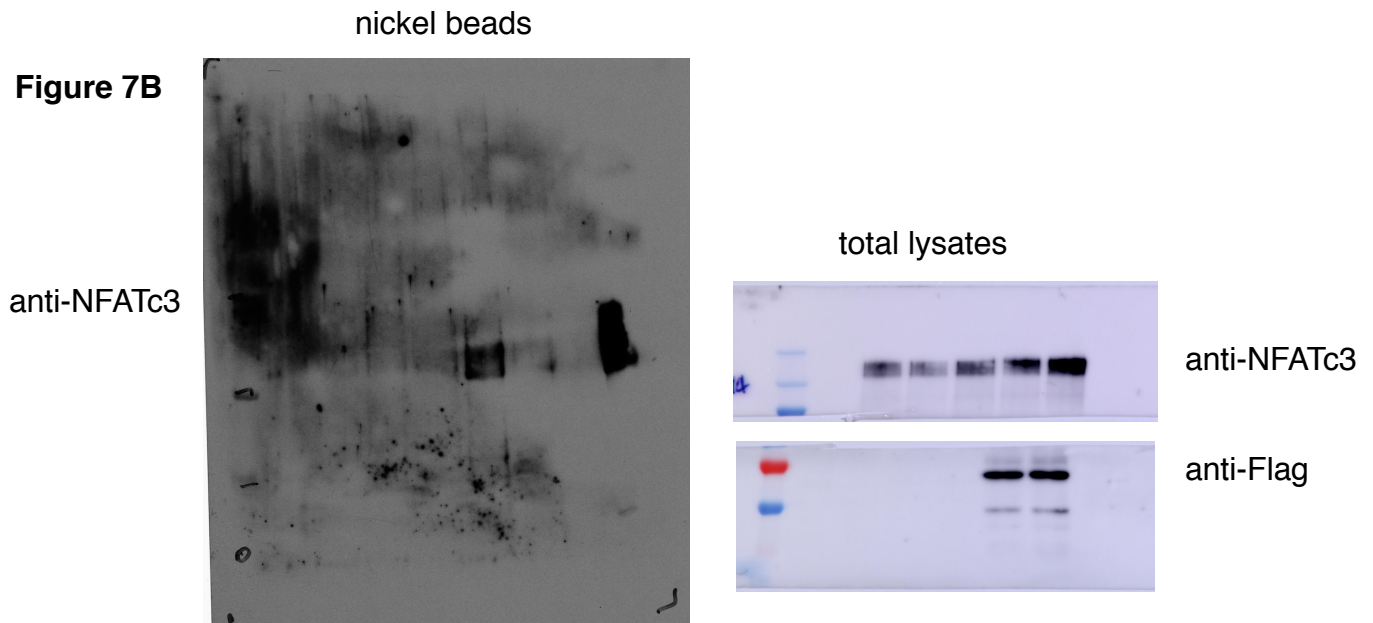

**Figure 7C left**

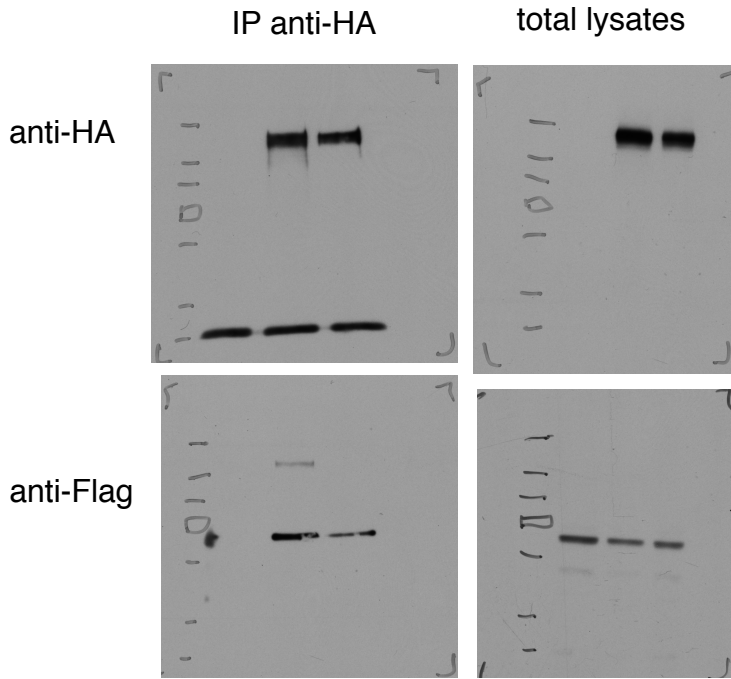

**Figure 7C right**

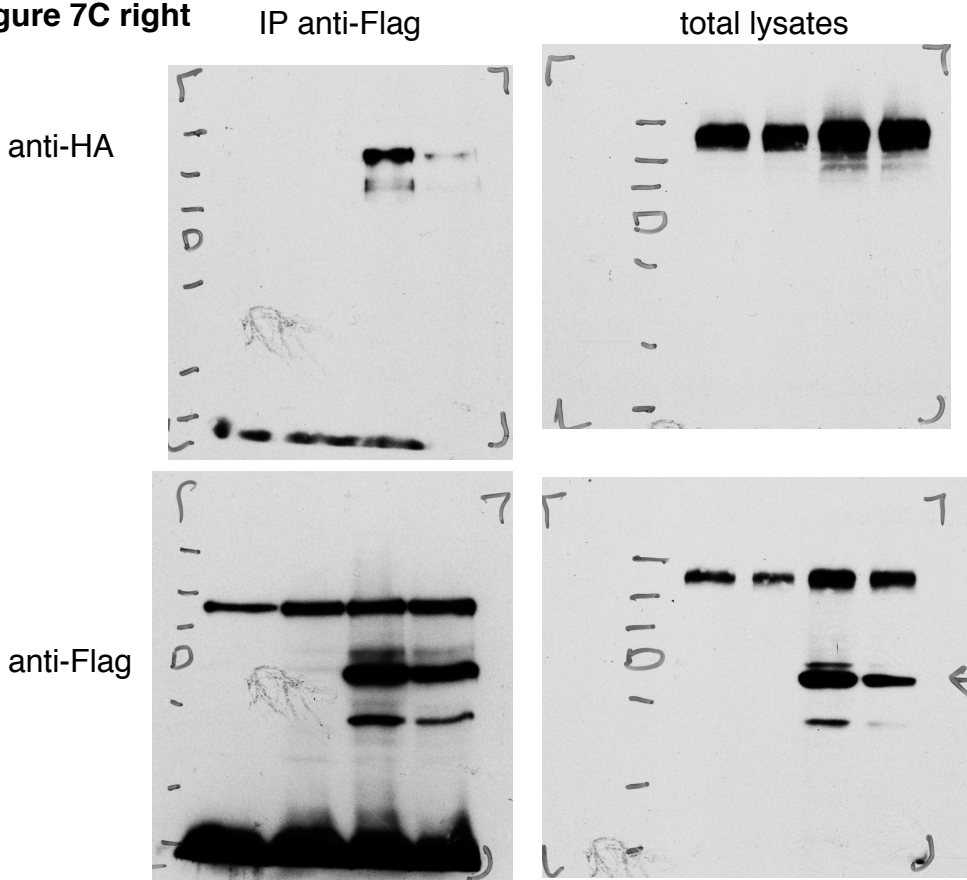

**Figure 7E**

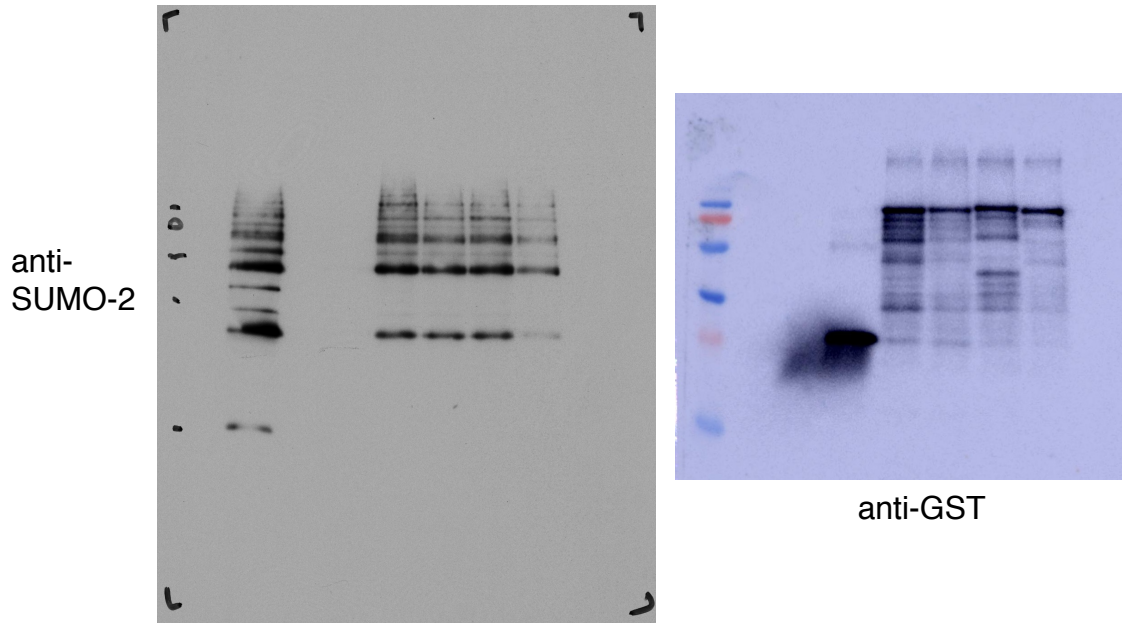

**Figure 7F**

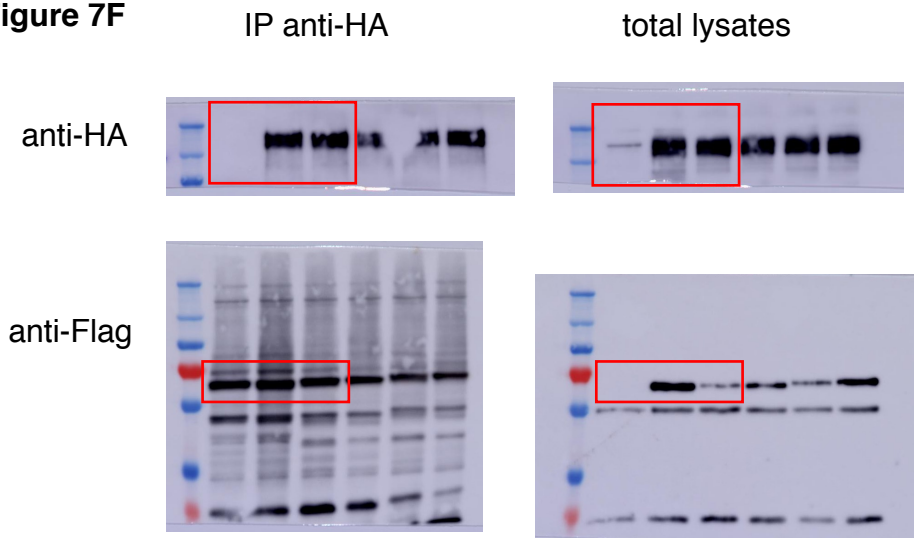

**Figure 7G**

nickel beads

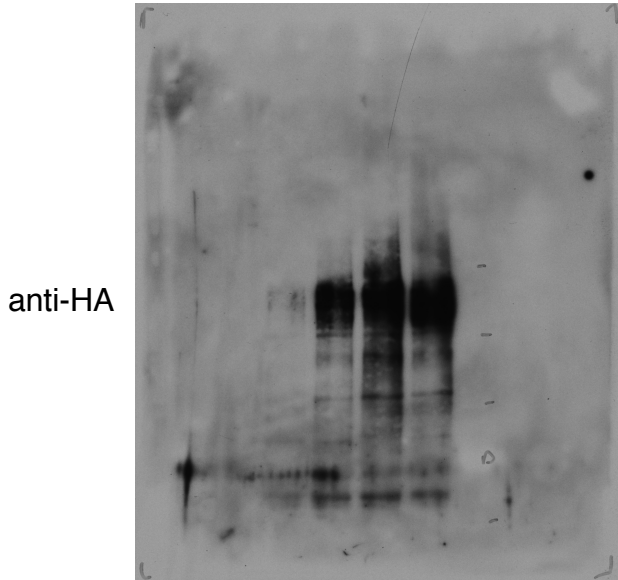

total lysates

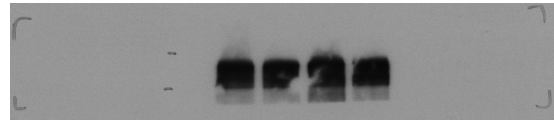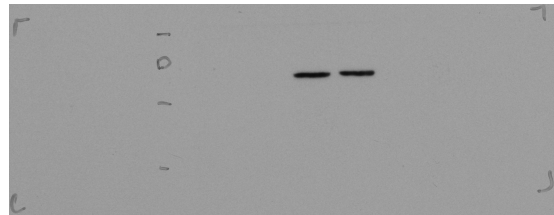

**Figure 7H**

anti-HA

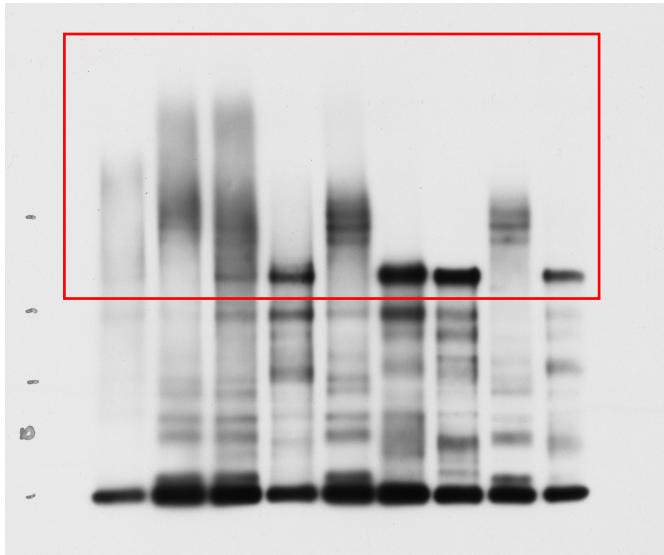

anti-Trim39

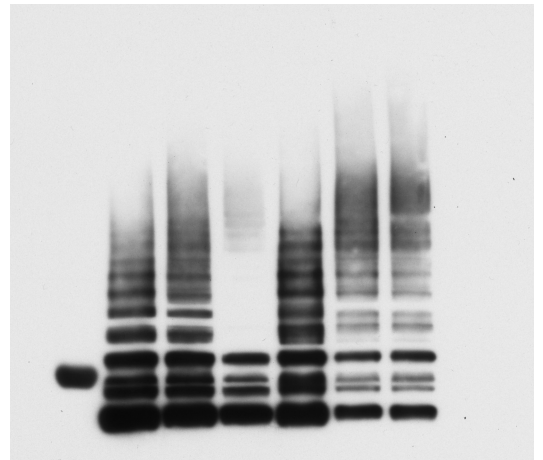

**Figure 7I**

anti-SUMO-2

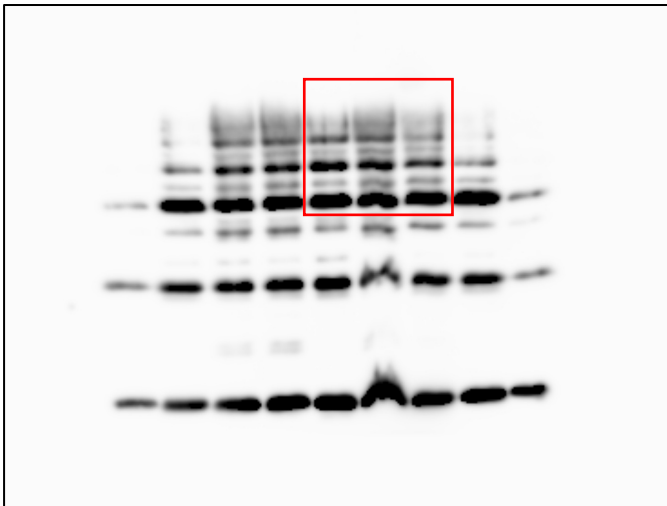

anti-Trim39

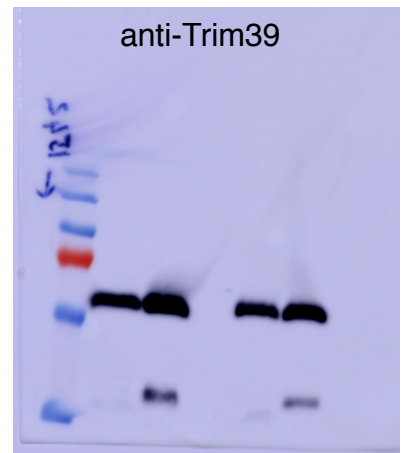

**Figure S6A**

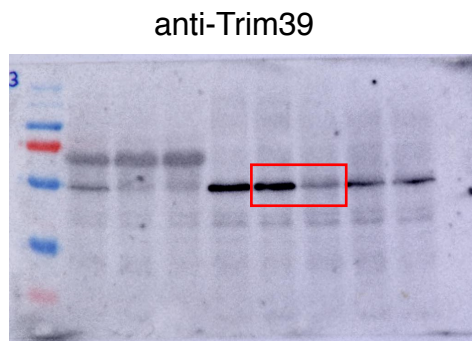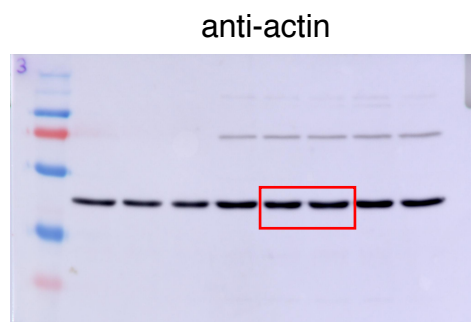

**Figure S6B**

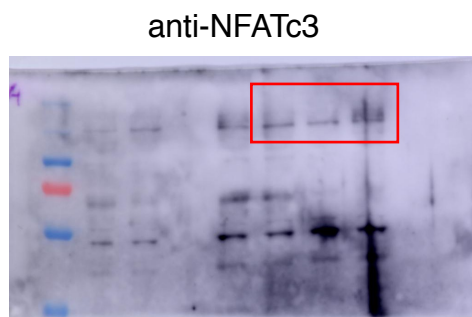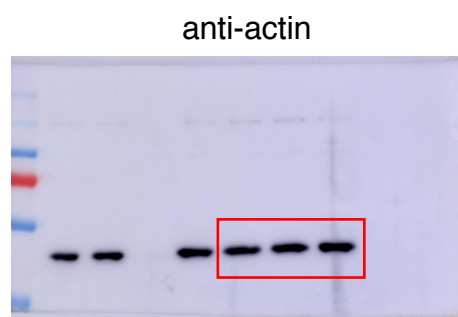

**Figure 8E**

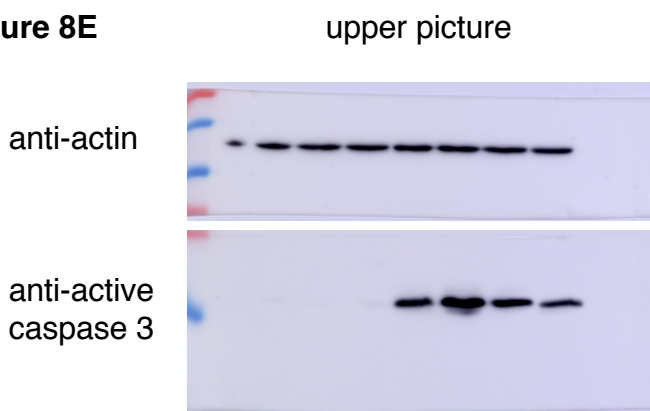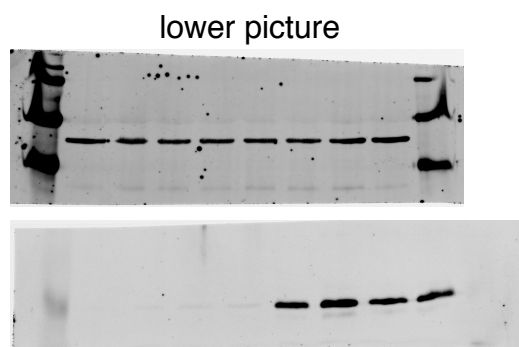

**Figure 8G**

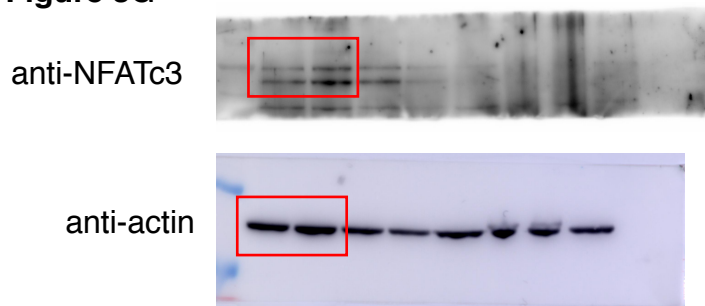

Supplement: 41418_2022_1002_MOESM2_ESM.pdf [file 41418_2022_1002_MOESM2_ESM.pdf]
